# Supplementary material for: TElehealth in CHronic disease: mixed-methods study to develop the TECH conceptual model for intervention design and evaluation
Source: HighWire-hosted journal article supplement (doi:10.1136/bmjopen-2014-006448), 2015-02-01
Supplement: bmjopen-2014-006448supp_Appendix1.pdf [file bmjopen-2014-006448supp_Appendix1.pdf]

**Appendix 1: Use of the model to design the Healthlines telehealth intervention for patients at raised cardiovascular risk or depression**

| <b>MODEL ELEMENT</b>             | <b>STRATEGIES INCLUDED IN INTERVENTION</b>                                                                                                                                                                                                                                                                                                                                                                                               |
|----------------------------------|------------------------------------------------------------------------------------------------------------------------------------------------------------------------------------------------------------------------------------------------------------------------------------------------------------------------------------------------------------------------------------------------------------------------------------------|
| <b>Engagement</b>                |                                                                                                                                                                                                                                                                                                                                                                                                                                          |
| Patient                          | Provide a 'Welcome Pack'. Emphasize that support with technology will be provided                                                                                                                                                                                                                                                                                                                                                        |
|                                  | Healthlines advisors provide technical support e.g. with getting logged in to websites                                                                                                                                                                                                                                                                                                                                                   |
|                                  | Promote the advantages to patients of using Healthlines, based on perceived advantages identified in qualitative research and other literature, and address perceived disadvantages                                                                                                                                                                                                                                                      |
|                                  | Encourage sense of personal care through seeking to maximize continuity of care from named Healthlines advisor                                                                                                                                                                                                                                                                                                                           |
|                                  | Regular positive reinforcement through monthly telephone calls from Healthlines advisor                                                                                                                                                                                                                                                                                                                                                  |
|                                  | Encourage sense of partnership between patient, Healthlines and GP through frequent communication                                                                                                                                                                                                                                                                                                                                        |
| Health professional              | All communications seek to reinforce the message that the Healthlines service is supporting and delivered alongside primary care                                                                                                                                                                                                                                                                                                         |
|                                  | Regular communication with primary care                                                                                                                                                                                                                                                                                                                                                                                                  |
|                                  | Messages to primary care continually emphasize evidence based nature of interventions and guidance                                                                                                                                                                                                                                                                                                                                       |
| <b>Promoting self-management</b> |                                                                                                                                                                                                                                                                                                                                                                                                                                          |
| Behaviour change techniques      | Healthlines cardiovascular intervention adapted from the Duke self-management package, which uses scripts for advisors based on psychological principles of behaviour change. Depression intervention encounters support use of the Living Life to the Full cognitive behaviour course, with additional modules relating to alcohol, exercise, relapse prevention. In both cases, intervention is tailored to patient's needs and goals. |
| Self-monitoring                  | CVD risk: Provide patients with free BP monitors and web-site to log readings<br><br>Depression: Patients using online Living Life to the Full regularly monitor their progress with self-assessment modules including score on PHQ9 questionnaire.                                                                                                                                                                                      |
| Feedback                         | CVD risk: BP website gives immediate feedback and graphical display about whether BP is above or below target and next actions                                                                                                                                                                                                                                                                                                           |
| Provide patient                  | Healthlines advisor works with patients to identify goals and then emails                                                                                                                                                                                                                                                                                                                                                                |

|                                            |                                                                                                                                                                                                                                                                                                                                                                                                   |
|--------------------------------------------|---------------------------------------------------------------------------------------------------------------------------------------------------------------------------------------------------------------------------------------------------------------------------------------------------------------------------------------------------------------------------------------------------|
| information                                | them links to further resources available on the internet which have been quality assessed (e.g. diet advice, risk calculators, videos, patient forums)                                                                                                                                                                                                                                           |
| Promote self-efficacy                      | Using motivational interviewing approach, identify motivating factors, encourage action plans and goal setting                                                                                                                                                                                                                                                                                    |
| Motivational interviewing                  | All Healthlines advisors undertake motivational interviewing training                                                                                                                                                                                                                                                                                                                             |
| Shared decision making                     | Make targets (e.g. for BP) explicit to patients, provide information about advantages and disadvantages of treatments, encourage patients to discuss options with GP, share letters to GPs with patients                                                                                                                                                                                          |
| Personal support from health professionals | As far as possible, provide continuity of care from one named Healthlines advisor rather than an anonymous 'call-centre' approach                                                                                                                                                                                                                                                                 |
| Peer support                               | Patients in depression intervention are offered option to access Big White Wall, an online forum for patients with depression                                                                                                                                                                                                                                                                     |
| <b>Treatment optimization</b>              |                                                                                                                                                                                                                                                                                                                                                                                                   |
| Risk stratification                        | CVD: Calculate cardiovascular risk using QRISK. Level of intervention guided by level of risk factor with escalation to GP for patients at high risk<br><br>Depression: Assessment using PHQ9 and advice about treatment in relation to severity. PHQ9 also used to assess suicidal risk with use of a protocol for escalation and more detailed risk assessment for patients at significant risk |
| Treatment intensification                  | CVD: Monthly review of BP using online log of BP readings, protocol driven advice to GP to intensify treatment each month if targets not met<br><br>Depression: Regular monitoring of PHQ9 score and review and intensification of treatment if no improvement                                                                                                                                    |
| Evidence-based guidelines and protocols    | Healthlines advisors' scripts all based on careful review of national guidelines.<br><br>Encourage compliance with guidelines by sending GPs a simple flow chart summary with each treatment recommendation                                                                                                                                                                                       |
| Regular review                             | Healthlines advisors telephone patients monthly, based on scripts which raise new topics each month and review progress against goals                                                                                                                                                                                                                                                             |
| Promote medication adherence               | Monthly review of medication adherence, scripts use evidence based strategies to improve adherence, advice to GPs by email if patients are non-adherent                                                                                                                                                                                                                                           |
| Share recommendations with patients        | Patients are given online access to guidelines and treatment recommendations sent to GPs                                                                                                                                                                                                                                                                                                          |
| <b>Care co-ordination</b>                  |                                                                                                                                                                                                                                                                                                                                                                                                   |
| Multi-component                            | Intervention combines interactive patient web portal, self-monitoring,                                                                                                                                                                                                                                                                                                                            |

|                                                                |                                                                                                                                                                                                                                                                                                                              |
|----------------------------------------------------------------|------------------------------------------------------------------------------------------------------------------------------------------------------------------------------------------------------------------------------------------------------------------------------------------------------------------------------|
| interventions                                                  | and telephone support from health advisor                                                                                                                                                                                                                                                                                    |
| Shared records                                                 | At onset, Healthlines receives information about patients from primary care records. All treatment recommendations shared with both primary care provider and patient. CVD: A summary of recent BP records from patient web-portal is sent to GP when treatment change is recommended.                                       |
| Communication between the telehealth provider and primary care | Ideally, Healthlines advisors would visit general practices to build relationships, facilitate engagement with telehealth, resolve problems, but this was not achieved in this trial.                                                                                                                                        |
| Regular monitoring of system performance                       | Reporting module which allows monitoring of management program (e.g. of number of patients who have been telephoned, number actively self-monitoring BP, number participating in on line cognitive behaviour therapy)                                                                                                        |
| Support rather than duplicate primary care                     | All communications with primary care providers and patients reiterate the message that Healthlines is designed to support GPs in their role of managing patients. All treatment recommendations are made to GPs and copied to patients.                                                                                      |
| <b>Partnership</b>                                             |                                                                                                                                                                                                                                                                                                                              |
|                                                                | All communications are shared. Communication is two way: GPs can contact Healthlines e.g. to change a patient's BP target                                                                                                                                                                                                    |
|                                                                | GPs and service managers involved in designing the Healthlines intervention                                                                                                                                                                                                                                                  |
| <b>Context</b>                                                 |                                                                                                                                                                                                                                                                                                                              |
|                                                                | The nature and intensity of the intervention is tailored to the nature and severity of the patient's health condition.                                                                                                                                                                                                       |
|                                                                | Patients are only invited to participate if they are above a specified severity threshold                                                                                                                                                                                                                                    |
|                                                                | Recognizing that in the NHS patients have an enduring relationship with their GP, which reinforces the importance of supporting rather than duplicating or undermining that role                                                                                                                                             |
|                                                                | Not all patients have access to reliable internet connections, so this intervention is only likely to be relevant to a proportion of those in need. Provide technical support to help patients, for example, log in to web portal. In evaluation, it is important to describe the characteristics of patients who take part. |
