# Supplementary material for: TElehealth in CHronic disease: mixed-methods study to develop the TECH conceptual model for intervention design and evaluation
Source: HighWire-hosted journal article supplement (doi:10.1136/bmjopen-2014-006448), 2015-02-01
Supplement: bmjopen-2014-006448supp_Appendix2.pdf [file bmjopen-2014-006448supp_Appendix2.pdf]

## Appendix 2 Web-portal for patients in cardiovascular intervention

### Welcome Mary Grosvenor

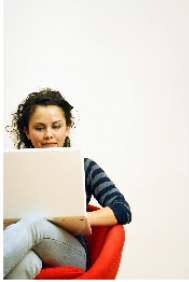

Welcome to the NHS Direct Healthlines Service. This is a new service designed to help you improve your health from the convenience of your own home.

Healthlines Advisors at NHS Direct will provide you with regular advice and support over the telephone. They will help you to make best use of many of the resources available through the internet which are designed to improve health.

The Healthlines service is designed to support the care you already receive from your GP and practice nurse.

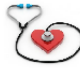

[My Heart Health](#)

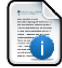

[Welcome Pack](#)

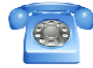

[Request a Call Back](#)

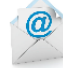

[Letters to my GP](#)

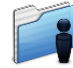

[Change My Details](#)
