# Supplementary material for: TElehealth in CHronic disease: mixed-methods study to develop the TECH conceptual model for intervention design and evaluation
Source: HighWire-hosted journal article supplement (doi:10.1136/bmjopen-2014-006448), 2015-02-01
Supplement: bmjopen-2014-006448supp_Appendix3.pdf [file bmjopen-2014-006448supp_Appendix3.pdf]

# Appendix 3 Blood pressure self-monitoring system

## My Heart Health

Information Enter New Blood Pressure Reading Blood Pressure History Blood Pressure Targets

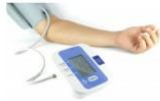

Use this page to enter your blood pressure reading. Remember that you will need to take two readings, but you only need to enter the second reading.

Reading Taken Date: 30/08/2012 Time: 14:00

Blood pressure reading – only enter your second reading:

Systolic (SYS): 120

Diastolic (DIA): 80

Save

Information Enter New Blood Pressure Reading Blood Pressure History Blood Pressure Targets

Average reading within the last six days: /

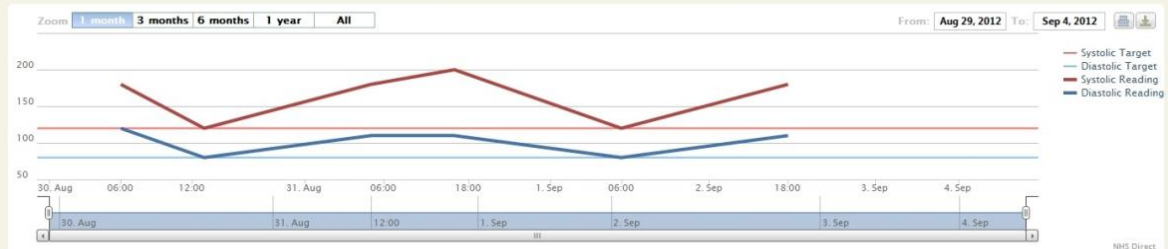

| Date and time of reading | Blood pressure reading | Status                      |
|--------------------------|------------------------|-----------------------------|
| 05/09/2012               |                        | Reading expected            |
| 05/09/2012               |                        | Reading expected            |
| 04/09/2012               |                        | Reading expected            |
| 04/09/2012               |                        | Reading expected            |
| 03/09/2012               |                        | Reading expected            |
| 03/09/2012               |                        | Reading expected            |
| 02/09/2012 19:00:00      | 180/110                | Over Target Threshold       |
| 02/09/2012               |                        | Reading expected            |
| 01/09/2012 07:00:00      | 120/80                 | Within Target               |
| 01/09/2012               |                        | Reading expected            |
| 31/08/2012 18:00:00      | 200/110                | Over High Warning Threshold |
| 31/08/2012 05:00:00      | 180/110                | Over Target Threshold       |
